# Supplementary material for: Rare disruptive mutations in ciliary function genes contribute to testicular cancer susceptibility
Source: PubMed Central journal article supplement (PMC5187424; doi:10.1038/ncomms13840), 2016-12-20
Supplement: ncomms13840-s1.pdf [file ncomms13840-s1.pdf]

**Supplementary Figure 1. Evidence to support biallelic inactivation was observed in tumor material from 2/3 available cases.** A 297bp region within exon 4 of DNAAF1 was captured (chr16:84203572-84203869), and germline/tumor product lengths are shown for the 2 cases with biallelic inactivation. In PED-2152 a 23bp deletion was present in this region in the germline, resulting in a germline product length of 274bp. For the PED-2152 tumor sample a second truncated product length is also clearly observed, containing a second somatic 100bp deletion not found in the germline. For S-1645, a sample from our sporadic cases, a nonsense point mutation is present in the germline, meaning a full 297 bp germline product length for this region. For the S-1645 tumor sample again a second truncated product length is detected, caused by a somatic deletion.

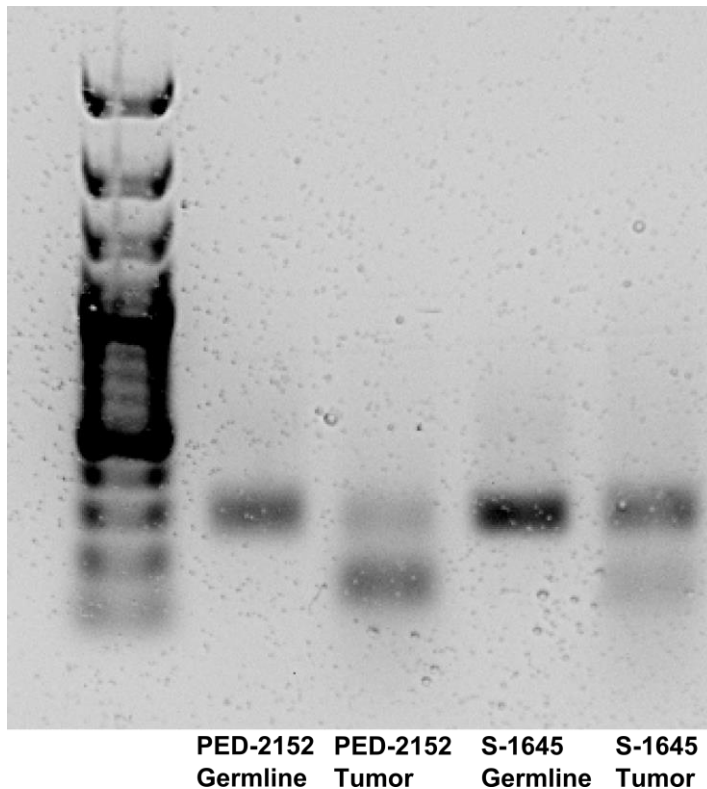

**Supplementary Figure 2a. Comparison of wild-type male zebrafish and mutant  $DNAAF1^{Hu255h}(+/-)$  zebrafish.** On top is the healthy wild-type zebrafish compared to mutant  $DNAAF1^{Hu255h}(+/-)$  zebrafish with visible tumor mass on bottom. TGCT was confirmed through histological characterization.

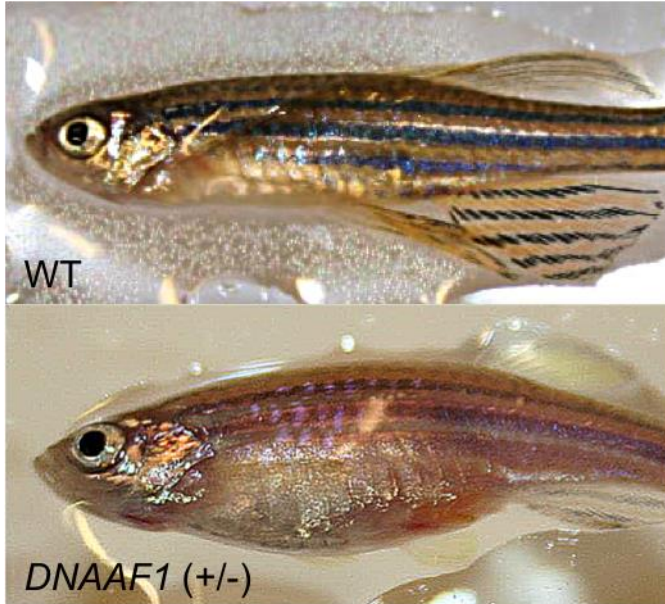

**Supplementary Figure 2b. Histological characterisation of zebrafish and human tissue.** On top left is age-matched (24–44 months old) wild-type zebrafish and on bottom left is the zebrafish *DNAAF1*<sup>Hu255h</sup>(+/-) tumor tissue, morphological tissue analysis of toluidine blue stained sections shows a dramatic loss of differentiated germ cells. On the top right for comparison is a healthy human testis and bottom right is a human seminoma.

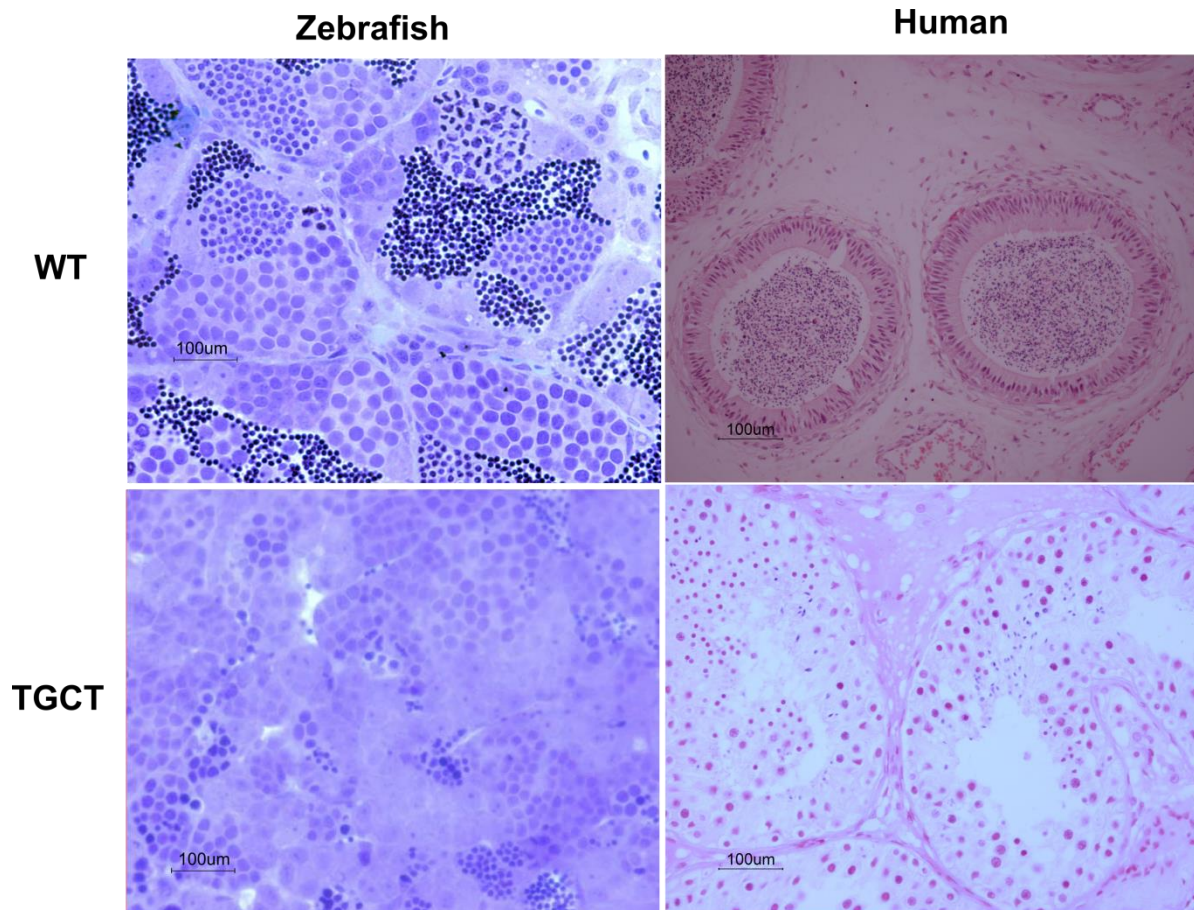

**Supplementary Figure 3. Ciliary structures adjacent to germ cell syncytium intercellular bridges from high resolution images of wild-type zebrafish male gonads.** Spermatogonial stem cells commit to the development of spermatozoa via sequential steps of proliferation and differentiation after initial asymmetric cell division. A hallmark feature of spermatogonial derived early germ cell is the presence of intercellular bridges, concomitant from prematurely blocked cytokinesis followed by intercellular bridge stabilization. Presented are two gonadal sections displaying two adjacent male germ cell associated through intercellular bridges. Intriguingly, we observed presence of ciliary structures in the immediate vicinity of intercellular bridges. As the sections are ultrathin, only one of either cilium is visible as the corresponding cilium or centrosome is not in the same plane. A: The lower cell 2 shows mother and daughter centrioles where microtubules emanating from the mother centriole extend into a structure reminiscent of the primary vesicle (insert\*\*). In cell 1, one centriole can be observed in the same plane B: Cell 2 shows presence of a cilium clearly featured by an axonemal structure composed of a membrane wrapped microtubule structure. Cell membranes are indicated in yellow.

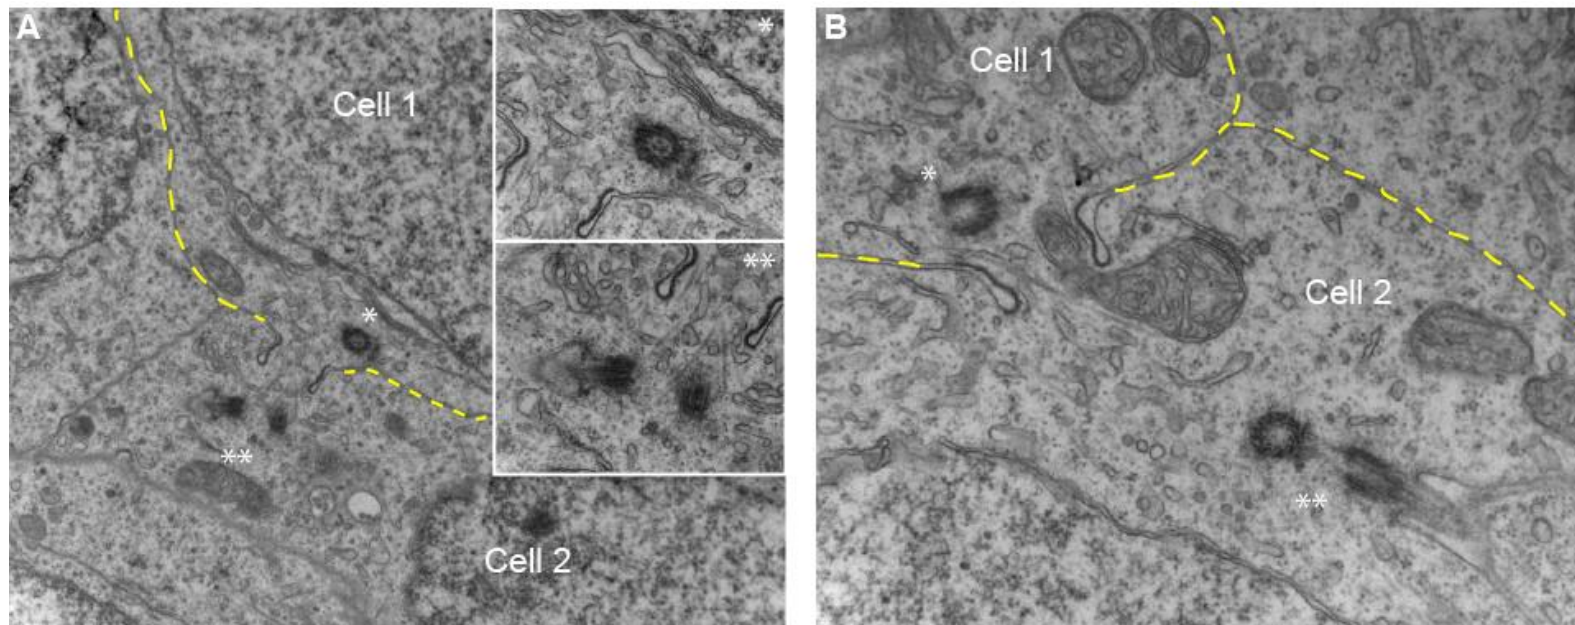

**Supplementary Table 1. Gene Set Enrichment Analysis (GSEA) of rare disruptive mutations, which shows a significant association for familial TGCT with cilia-microtubule function.** Shown are the genes contributing to the leading edge of the top 5 pathways ranked based on enrichment score. Only the cilia-microtubule gene set was significant (*i.e.*  $Q$  value  $< 0.1$ ). The genes displayed are those that contribute to the leading edge of each gene set, the value in each cell is the  $-\log_{10}$ (T1 test  $P$ -value) used in the ranking for GSEA. Genes with values greater than 1.0 are shown. Please note while gene sets “Reactome loss of nlp from mitotic centrosomes” and “Reactome recruitment of mitotic centrosome” do not differ in terms of leading edge genes, they are different gene sets overall, with the latter being a larger set and hence the association is less significant.

|                                                                   | $Q$  | <i>DNAAF1</i> | <i>DRC1</i> | <i>MAP4</i> | <i>DYNC2H1</i> | <i>CEP290</i> | <i>CNTRL</i> | <i>DYNC1H1</i> | <i>HSP90AA1</i> | <i>CEP135</i> | <i>ALMS1</i> | <i>CDK5RAP2</i> | <i>MIS12</i> | <i>CENPE</i> | <i>SRPK1</i> | <i>PDS5B</i> | <i>PAPD7</i> | <i>GSTM4</i> | <i>GSTO1</i> | <i>GSS</i> |
|-------------------------------------------------------------------|------|---------------|-------------|-------------|----------------|---------------|--------------|----------------|-----------------|---------------|--------------|-----------------|--------------|--------------|--------------|--------------|--------------|--------------|--------------|------------|
| Cilia-microtubule function                                        | 0.01 | 2.8           | 2.3         | 1.8         | 1.7            | 1.4           |              |                |                 |               |              |                 |              |              |              |              |              |              |              |            |
| Reactome loss of nlp from mitotic centrosomes                     | 0.11 |               |             |             |                | 1.4           | 2.6          | 1.8            | 1.7             | 1.4           | 1.1          | 1.1             |              |              |              |              |              |              |              |            |
| Reactome recruitment of mitotic centrosome proteins and complexes | 0.34 |               |             |             |                | 1.4           | 2.6          | 1.8            | 1.7             | 1.4           | 1.1          | 1.1             |              |              |              |              |              |              |              |            |
| Chromosome segregation                                            | 0.37 |               |             |             |                |               |              |                |                 |               |              |                 | 1.9          | 1.8          | 1.7          | 1.7          | 1.4          |              |              |            |
| Reactome glutathione conjugation                                  | 0.34 |               |             |             |                |               |              |                |                 |               |              |                 |              |              |              |              |              | 3.9          | 1.4          | 1.1        |

**Supplementary Table 2. *DNAAF1* missense allele frequencies from Basten et al. (2013).**

| <b>Mutation</b> | <b>ExAC Minor Allele<br/>Frequency</b> | <b>UK Control Minor<br/>Allele Frequency</b> | <b>P-Value for association<br/>with TGCT in UK Study</b> |
|-----------------|----------------------------------------|----------------------------------------------|----------------------------------------------------------|
| Gln307Glu       | 2.0%                                   | 2.4%                                         | 0.8                                                      |
| Asp435Asn       | 2.5%                                   | 2.8%                                         | 0.1                                                      |
| Thr590Met       | 1.0%                                   | 2.1%                                         | 0.3                                                      |

**Supplementary Table 3. Primer sequences used to confirm rare disruptive variants in cilia microtubule genes in germline samples and to examine for loss of heterozygosity in tumour samples.**

| <b>Oligo sequence (5'-3')</b> | <b>Oligo name</b> | <b>Gene</b>    |
|-------------------------------|-------------------|----------------|
| AAGGAAAGCTTTGAGGCCAA          | DNAAF1_1F         | <i>DNAAF1</i>  |
| AGGCGGTGACAGTAGCAG            | DNAAF1_1R         | <i>DNAAF1</i>  |
| TGCCTTTATCGTGCCTATCAG         | DNAAF1_1F         | <i>DNAAF1</i>  |
| GGAACATTTTACTTTCAAGTTTAGGA    | DNAAF1_1R         | <i>DNAAF1</i>  |
| GTCACTCCCTGTGCTGGAAA          | DNAAF1_1F         | <i>DNAAF1</i>  |
| AGTGGTGCAGCATCTCTTTG          | DNAAF1_1R         | <i>DNAAF1</i>  |
| GGGGTTCCTCATAGAGAGCA          | DRC1_1F           | <i>DRC1</i>    |
| AAGGATGTGACAGGGAGCAG          | DRC1_1R           | <i>DRC1</i>    |
| GCACCGAGTTGGTGACAAAT          | DRC1_2F           | <i>DRC1</i>    |
| GAGGGAGGGAGGGAGAAGTT          | DRC1_2R           | <i>DRC1</i>    |
| TTTTTCTAGTTGATCCTGATTTTCTAA   | DYNC2H1_1F        | <i>DYNC2H1</i> |
| ACCCGCAACATAGCATTGTG          | DYNC2H1_1R        | <i>DYNC2H1</i> |
| AGGTGGGGTTCAAGTTAGG           | MAP4_1F           | <i>MAP4</i>    |
| ACACAGTCCCTGGCTCAAAG          | MAP4_1R           | <i>MAP4</i>    |
| TGGTCACAAAAATCAATAAAGAATG     | CEP290_1F         | <i>CEP290</i>  |
| GGTCTTCAAAATGTGAATTTGTT       | CEP290_1R         | <i>CEP290</i>  |
| CCTTTGTTGAACCACCACAAC         | CEP290_2F         | <i>CEP290</i>  |
| GGTGGGAGAATTGCTTGA            | CEP290_2R         | <i>CEP290</i>  |
| AACTTACCAATTTTCCAATAAGA       | LRRC6_1F          | <i>LRRC6</i>   |
| TTGAACAATGGGGACAGAAA          | LRRC6_1R          | <i>LRRC6</i>   |
| CAAGAGCAGCATGAGGTGAA          | CNTRL_1F          | <i>CNTRL</i>   |
| GCACAGGGTCCTTAGTTTGC          | CNTRL_1R          | <i>CNTRL</i>   |
| AGCCTGGTAGGCAATGTGAT          | CNTRL_2F          | <i>CNTRL</i>   |
| TGGGTACCAACTGACCTG            | CNTRL_2R          | <i>CNTRL</i>   |

**Supplementary Note 1. The UK Testicular Cancer Collaboration (UKTCC).**

| <b>Principal Investigator</b>                  | <b>Study Centre</b>                          | <b>Study centre address</b>                                                                  |
|------------------------------------------------|----------------------------------------------|----------------------------------------------------------------------------------------------|
| Rustin, Prof Gordon                            | Mount Vernon Hospital                        | Mount Vernon Cancer Centre, Rickmansworth Road, Northwood, Middlesex,<br>HA6 2RN             |
| Srihari, Dr                                    | Royal Shrewsbury Hospital                    | Trials Unit, Oncology Department, Mytton Oak Road, Shrewsbury, SY3 8XB                       |
| Cole, Dr David                                 | Great Western Hospital                       | 3rd Floor, Osprey Unit, Swindon, Wilts, SN3 6BB                                              |
| Askill, Dr Colin & Bertelli, Dr<br>Gianfilippo | Singleton Hospital and Morriston<br>Hospital | SWW Cancer Institute, Sketty, Swansea, SA2 8QA                                               |
| Barber, Dr James                               | Velindre Hospital                            | Clinical Trials Unit, Velindre Cancer Centre, Velindre Road, Whitchurch,<br>Cardiff CF14 2TL |
| Gilby, Dr Ed                                   | Royal United Hospital                        | Dept of Oncology and Haematology, Combe Park, Bath, BA1 3NG                                  |
| Huddart, Dr Robert                             | Royal Marsden Hospital Sutton                | Downs Rd, Sutton, SM2 5PT                                                                    |
| White, Dr Jeff                                 | Beatson Oncology Centre                      | Beatson West of Scotland Cancer Centre, 1053 Great Western Road, Glasgow,<br>G11 0YN         |



|                                                   |                                       |                                                                                                                       |
|---------------------------------------------------|---------------------------------------|-----------------------------------------------------------------------------------------------------------------------|
| Braybrooke, Dr Jeremy                             | Bristol Haematology & Oncology Centre | United Bristol Healthcare NHS trust, Horfield Rd, Bristol, BS2 8ED                                                    |
| Leahy, Dr M and Welch, Dr R                       | Christie Hospital                     | Wilmslow Road, Withington, Manchester, M20 4BX                                                                        |
| Chakraborti, Dr P                                 | Derbyshire Royal Infirmary            | Derby Hospitals NHS Trust, London Road, Derby, DE1 2QY                                                                |
| Joffe, Dr J                                       | St James Hospital Leeds               | Dept of Medical Oncology, Leeds, LS9 7TF                                                                              |
| Brown, Dr Richard                                 | Wexham Park Hospital                  | Cancer Clinical Trials, John Ulster Post Grad Centre, Slough, Berks, SL2 4HL                                          |
| Faust, Dr Guy                                     | Leicester Royal Infirmary             | LNR Cancer Reseach Network, Knighton St, Leicester LE1 5WW                                                            |
| Simmonds, Dr Peter                                | Southampton General Hospital          | Cancer Care Directorate, Medical Oncology, Mailpoint 306, Southampton<br>General Hospital, Tremona Rd, SO16 6YD       |
| Mazhar, Dr danish                                 | Addenbrookes Hospital                 | Addenbrookes Hospital, Cambridge Clinical Trials Centre, Oncology Clinical<br>Trials, (S4) Box 279, Hills Rd, CB2 0QQ |
| Stockdale, Dr A & Hrouda, Dr D<br>& Humber, Dr C. | University Hospital Walsgrave         | Arden Cancer Centre, West Wing, UHCW NHS trust, Clifford Bridge Rd,<br>Coventry, CV2 2DX                              |
| Appel, Dr Wiebke                                  | Royal Preston Hospital                | Dept of Oncology, Royal Preston Hospital, Sharoe Green Lane North, Fulwood<br>Preston, PR2 9HT                        |
| Hong, Dr Anne                                     | Royal Devon & Exeter                  | Exeter Oncology Centre, Royal Devon and Exeter Hospital, Barrack Rd, Exeter<br>EX2 5DW                                |

|                                 |                              |                                                                                                                                                                           |
|---------------------------------|------------------------------|---------------------------------------------------------------------------------------------------------------------------------------------------------------------------|
| Dr Howard                       | Western General Hospital     | Scottish Cancer Research Network, Oncology Admin Corridor, Edinburgh<br>Cancer Centre, Western General Hospital, Crewe Rd South, Edinburgh, EH4<br>2XU                    |
| Dr Fiona Douglas                | Freeman Hospital             | Clinical Trials Unit, Newcastle General Hospital, Westgate Rd, Newcastle-<br>upon Tyne, NE4 6BE                                                                           |
| Bllomfield, Dr David            | Royal Sussex County Hospital | Brighton and Sussex University Hospitals, The Sussex Cancer Centre, The<br>Royal Sussex County Hospital, Eastern Road, Brighton, BN2 5BE                                  |
| Dr Mohammad Butt                | Castle Hill Hospital         | Castle Hill Hospital, Castle Road, Cottingham HU16 5JQ                                                                                                                    |
| Dr Kay Kelly                    | Raigmore Hospital            | Raigmore Hospital, Old Perth Road, Inverness, IV2 3UJ                                                                                                                     |
| Dr R Mehra                      | New Cross Hospital           | Greater Midlands Cancer Research Network, The Chestnuts, The Royal<br>Wolverhampton Hospitals, New Cross Hospital NHS Trust, Wednesfield Road,<br>Wolverhampton, WV10 0QP |
| Dr Richard Brown/Dr Paul Rogers | Royal Berkshire Hospital     | Royal Berkshire Hospital, Berkshire Cancer Centre, London Road, Reading,<br>Berkshire, RG1 5AN                                                                            |
| Chakraborti, Dr P               | Queen's Hospital Burton      | Queens Hospital, Burton upon Trent, Belvedere Road, Burton, DE13 0RB                                                                                                      |
| Dr Matthew Hatton               | Weston Park Hospital         | Consultant Clinical Radiologist. Sheffield Teaching Hospitals NHS Foundation<br>Trust, 8 Beech Hill Road, Sheffield S10 2SB                                               |

|                     |                                              |                                                                                                     |
|---------------------|----------------------------------------------|-----------------------------------------------------------------------------------------------------|
| Hennig, Dr Ivo      | Nottingham City Hospital                     | Nottingham University Hospitals NHS Trust, City Hospital campus, Hucknall Road, Nottingham, NG5 1PB |
| Dr J McAteer        | Belfast City Hospital                        | Northern Ireland Cancer Centre, Belfast City Hospital, Lisburn Rd, Belfast, BT9 7AB                 |
| Dr Savage/Dr Seckl  | Charing Cross Hospital                       | Dept of Medical Oncology, Charing Cross, Fulham, Palace Rd, London W6 8RF                           |
| Dr Joanna Gale      | Portsmouth Haematology & Oncology Centre     | Level B Queen Alexandra Hospital, Cosham, Portsmouth, PO6 3LY                                       |
| Rustin, Prof Gordon | Hillingdon Hospital                          | R&D Office - Education Centre, Hillingdon Hospital, Field Heath Road, Hillingdon, UB8 3NN           |
| Prof Peter Clark    | Royal Liverpool & Broadgreen Hospitals       | Prescot Street Liverpool, L78XP                                                                     |
| Dr Steve Woby       | Royal Oldham Hospital/Pennine Acute Hospital | Roachdale Road Oldham OL1 2JH                                                                       |
| Dr Adrian Rathmell  | James Cook Hospital                          | Middlesbrough TS4 3BW                                                                               |
| Dr Alan Lamont      | Colchester/Essex County Hospital             | Essex County                                                                                        |
| Dr Guy Faust        | Northampton General                          | Cliftonville, Northampton NN1 5BD                                                                   |

|                          |                                                      |                                                                                                                                                                            |
|--------------------------|------------------------------------------------------|----------------------------------------------------------------------------------------------------------------------------------------------------------------------------|
| Dr Naveed Sarwar         | Basildon Hospital                                    | Nethermayne Basildon Essex SS16 5NL                                                                                                                                        |
| Prof Nick Stuart         | Glan Clwyd Hospital and Ysbyty<br>Gwynedd            | NW Cancer Treatment Centre, Glan Clwyd Hospital, LL18 5UJ                                                                                                                  |
| Dr Simon Chowdhury       | Guys & St Thomas's                                   | St Thomas Street, London SE1 9RT                                                                                                                                           |
| Dr Sharon Beesley        | Maidstone and Tunbridge NHS Trust                    | Maidstone Hospital, Hemitage Lane, Barming, Maidstone, Kent ME16 9QQ                                                                                                       |
| Dr Winkler               | West Middlesex University Hospital                   | West Middlesex University Hospital NHS Trust, R&D Department, 4th Floor,<br>East Wing, Twickenham Road, Isleworth Middlesex TW7 6AF                                        |
| Dr Abdel Hamid           | Broomfield Hospital                                  | Broomfield Hospital, West Wing 2, Court Road, Broomfield, Chelmsford,<br>Essex CM1 7ET                                                                                     |
| Dr Sanjeev Pathak        | Doncaster Royal Infirmary                            | Joint Research Office of Doncaster and Bassetlaw Hospitals NHS Foundation<br>Trust, First Floor 'C' Block, Doncaster Royal Infirmary, Armthorpe Road,<br>Doncaster DN2 5LT |
| Dr Krishnaswamy Madhavan | Southend University Hospital NHS<br>Foundation Trust | Pittlewell Chase, Westcliff-On-Sea, Essex SSO 0RH                                                                                                                          |
| Dr Martin Highley        | Derriford Hospital (Plymouth)                        | Plymouth Hospitals NHS Trust, Derriford Hospital, Plymouth, PL6 8DH                                                                                                        |
| Dr Julian Money-Kyrle    | Royal Surrey County Hospital                         | Royal Surrey County Hospital, St Lukes Cancer Centre, Egerton Road,<br>Guildford, Surrey GU2 7XX                                                                           |

|                            |                                                        |                                                                                                        |
|----------------------------|--------------------------------------------------------|--------------------------------------------------------------------------------------------------------|
| Dr Cathryn Brock           | Chelsea & Westminster Hospital NHS<br>Foundation Trust | Chelsea & Westminster Hospital, Unit 101, 1st Floor, Harbour Yard, Chelsea<br>Harbour, London SW10 0XD |
| Dr Thiagarajan Sreenivasan | United Lincolnshire Hospitals NHS Trust                | Lincoln County Hospital, Greetwell Road, Lincoln, LN2 5QY                                              |
| Dr Thiagarajan Sreenivasan | United Lincolnshire Hospitals NHS Trust                | Pilgrim Hospital, Boston, Lincolnshire PE21 9QS                                                        |

**Supplementary Note 2. International Testicular Cancer Linkage Consortium (ITCLC) centers from which samples were used in this study.**

| <b>Investigators</b>                                                                                  | <b>Study Centre</b>                                         | <b>Study centre address</b>                                                                                                                 |
|-------------------------------------------------------------------------------------------------------|-------------------------------------------------------------|---------------------------------------------------------------------------------------------------------------------------------------------|
| D. Timothy Bishop, Gillian P. Crockford                                                               | St James's University Hospital, Leeds                       | Cancer Research UK Clinical Centre, St James's University Hospital, Leeds, UK                                                               |
| Michael R. Stratton, Elizabeth A. Rapley, Rachel Linger, Sarah Hockley, Darshna Dudakia, Lola Johnson | The Institute Of Cancer Research                            | Section of Cancer Genetics, Institute Of Cancer Research, 15 Cotswold Road, Sutton, Surrey SM2 5NG, UK                                      |
| Robert Huddart                                                                                        | The Institute Of Cancer Research/The Royal Marsden Hospital | Academic Radiotherapy Unit, Institute of Cancer Research, Sutton, Surrey, UK                                                                |
| Kathy Tucker, Michael Friedlander                                                                     | New South Wales and Prince of Wales Hospital                | Department of Medical Oncology, Division of Medicine, University of New South Wales and Prince of Wales Hospital Randwick, Sydney Australia |
| Kelly-Anne Phillips                                                                                   | Peter MacCallum Cancer Centre                               | Department of Haematology and Medical Oncology, Peter MacCallum Cancer Centre, East Melbourne, Victoria, Australia,                         |
| David Hogg, Michael A.S. Jewett                                                                       | Princess Margaret Hospital                                  | Princess Margaret Hospital and University of Toronto, Toronto, ON, Canada                                                                   |
| Radka Lohynska                                                                                        | University Hospital                                         | Department of Radiotherapy and Oncology, University Hospital, Prague, Czech Republic                                                        |
| Gedske Daugaard                                                                                       | Rigshospitalet                                              | Department of Oncology, Rigshospitalet, Copenhagen, Denmark                                                                                 |
| Stéphane Richard                                                                                      | Centre Expert National Cancers Rares PREDIR                 | Génétique Oncologique EPHE-UMR 8125 Faculté de Médecine Paris-Sud and Service d'Urologie, CHU, Le Kremlin-Bicêtre, France                   |
| Agnes Chompret                                                                                        | Institut Gustave Roussy                                     | Génétique Oncologique, Institut Gustave Roussy, Villejuif, France                                                                           |
| Catherine Bonaïti-Pellié                                                                              | Hôpital Paul Brousse                                        | INSERM U535, Hôpital Paul Brousse, Villejuif, France                                                                                        |
| Axel Heidenreich                                                                                      | Phillips University                                         | Department of Urological Oncology, Phillips University, Marburg, Germany                                                                    |
| Peter Albers                                                                                          | Klinikum Kassel GmbH                                        | Department of Urology, Klinikum Kassel GmbH, Moenchebergstr. 41-43, D-34125 Kassel, Germany                                                 |
| Edith Olah, Lajos Geczi, Istvan Bodrogi                                                               | National Institute of Oncology                              | Department of Molecular Genetics and Department of Chemotherapy, National Institute of Oncology, Budapest, Hungary                          |
| Wilma J. Ormiston, Peter A. Daly                                                                      | St James's Hospital                                         | Department of Medical Oncology, St James's Hospital, Dublin, Ireland                                                                        |
| Parry Guilford                                                                                        | University of Otago                                         | Cancer Genetics Laboratory, University of Otago, Dunedin, New Zealand                                                                       |

|                                         |                                                      |                                                                                                                                          |
|-----------------------------------------|------------------------------------------------------|------------------------------------------------------------------------------------------------------------------------------------------|
| Sergei A. Tjulandin, Ludmila Liubchenko | N.N. Blokhin Russian Cancer Research Center          | Laboratory of Clinical Genetics, Institute of Clinical Oncology, N.N. Blokhin Russian Cancer Research Center, Moscow, Russian Federation |
| Hans Stoll, Walter Weber                | University Hospital                                  | Medical Oncology, University Hospital, Basel, Switzerland                                                                                |
| David Forman                            | Cookridge Hospital                                   | Cancer Epidemiology, University of Leeds, Cookridge Hospital, Leeds LS16 6QB, UK                                                         |
| Timothy Oliver                          | Barts and The London Queen Mary's School of Medicine | Department of Medical Oncology, Barts and The London Queen Mary's School of Medicine, London, UK                                         |
| Douglas F. Easton                       | Cancer Research UK                                   | Cancer Research UK Genetic Epidemiology Unit, Strangeways Research Laboratory, Cambridge, UK                                             |
